# Supplementary material for: Long-Term Monitoring of Water and Air Quality at an Indoor Pool Facility during Modifications of Water Treatment
Source: MDPI journal article supplement (doi:10.3390/w14030335), 2022-01-24
Supplement: s1 [file s1]

Archive with 1 entries (1 files):
- water-1534488-supplementary.pdf
