# Supplementary material for: Long-Term Monitoring of Water and Air Quality at an Indoor Pool Facility during Modifications of Water Treatment
Source: MDPI journal article supplement (doi:10.3390/w14030335), 2022-01-24
Supplement: s1 [file s1 › water-1534488-supplementary.pdf]

Supporting Information for:

# Long-Term Monitoring of Water and Air Quality at an Indoor Pool Facility During Modifications of Water Treatment

Lester Lee <sup>1</sup> and Ernest R. Blatchley III <sup>1,2,\*</sup>

<sup>1</sup> Lyles School of Civil Engineering, Purdue University, West Lafayette, IN, USA

<sup>2</sup> Division of Environmental and Ecological Engineering, Purdue University, West Lafayette, IN, USA

\* Correspondence: blatch@purdue.edu

**Table S1.** Source water quality analysis.

| Parameter      | Reported Value                |
|----------------|-------------------------------|
| pH             | 7.4                           |
| Alkalinity     | 274 mg/L as CaCO <sub>3</sub> |
| Fluoride       | 0.7 mg/L                      |
| Orthophosphate | 0.5 mg/L                      |
| Free Ammonia   | 0.09 mg/L                     |
| Nitrate        | 1.1 mg/L                      |
| Nitrite        | 0.009 mg/L                    |
| Sulfate        | 70 mg/L                       |
| Calcium        | 300 mg/L as CaCO <sub>3</sub> |
| Magnesium      | 124 mg/L as CaCO <sub>3</sub> |
| Hardness       | 424 mg/L as CaCO <sub>3</sub> |

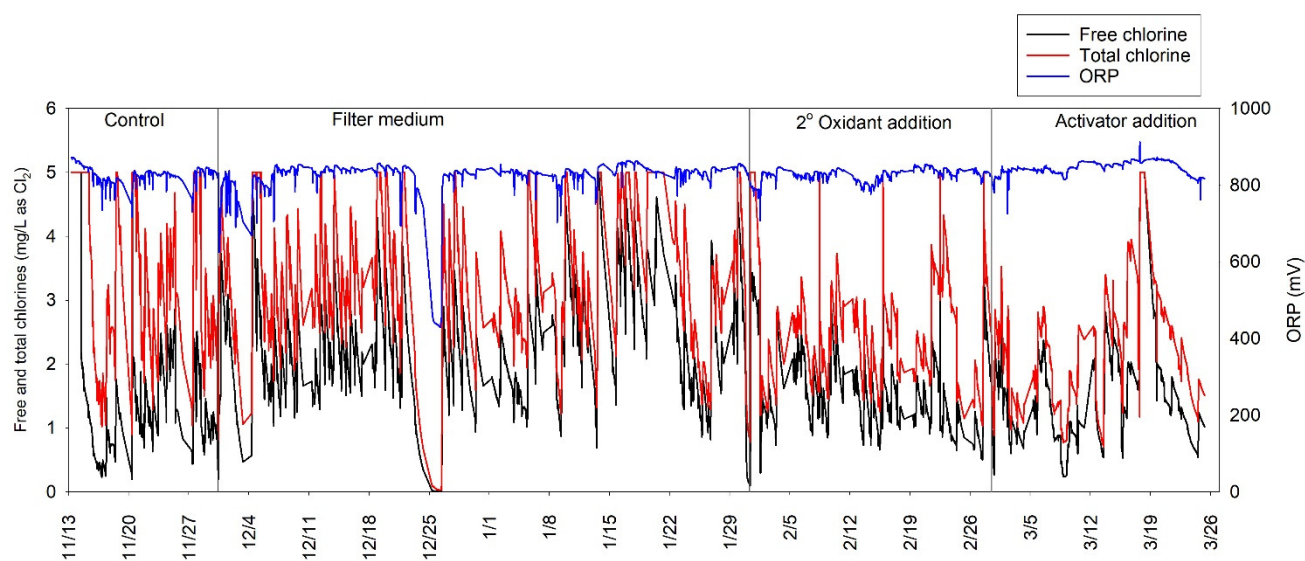

**Figure S1.** Time-course monitoring of free chlorine, total chlorine and ORP at the studied pool facility.

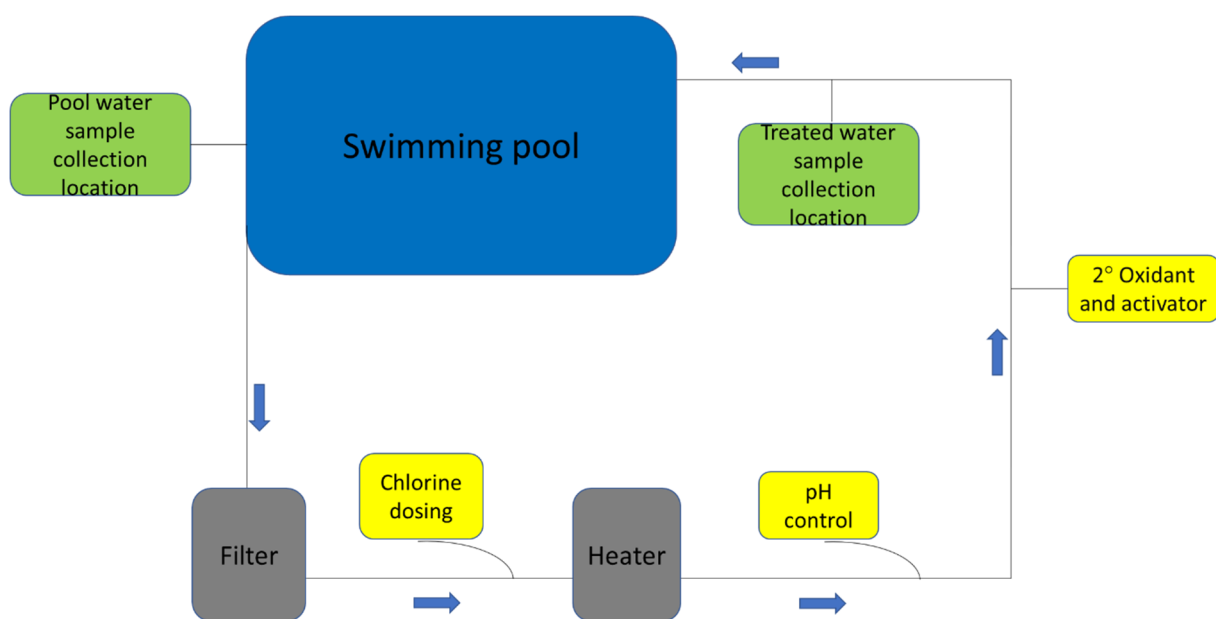

**Figure S2.** Schematic of pool water treatment process sequence with chemical dosing points and locations of pool water sampling locations.

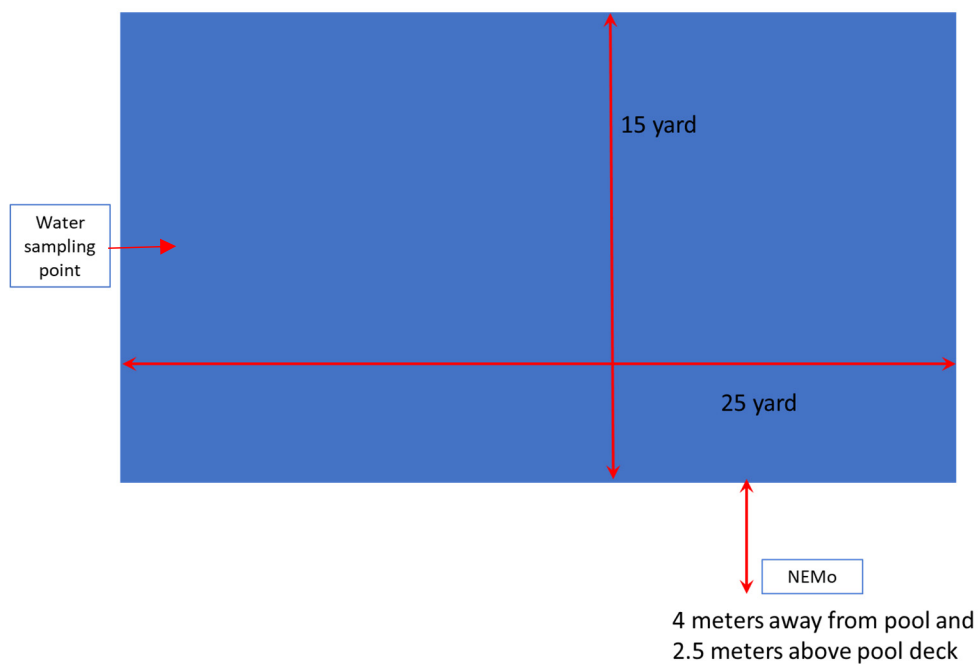

**Figure S3.** Water sampling and NEMo locations in the studied pool facility. Water samples were collected from roughly 20 cm below the water surface.

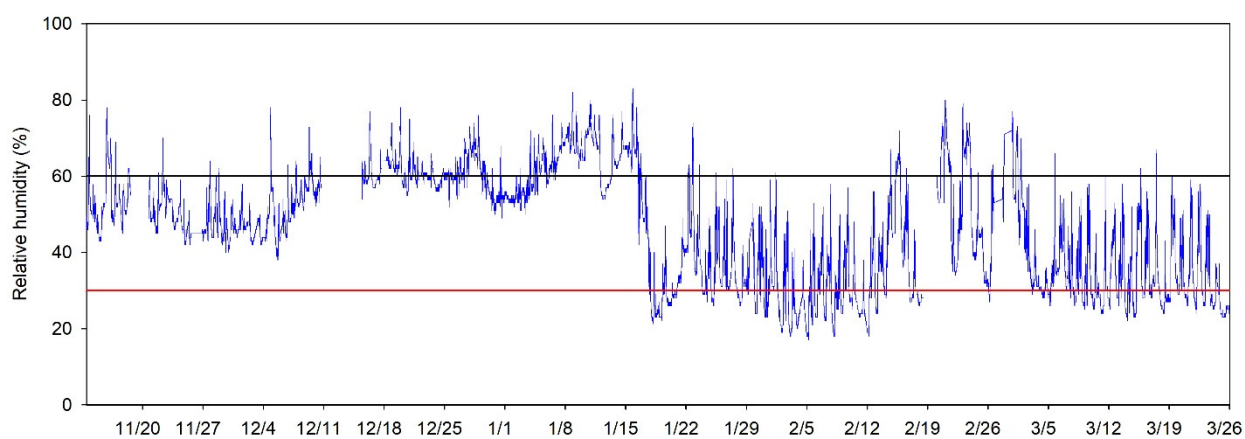

**Figure S4.** Time-course monitoring of Relative Humidity (RH) at the studied pool facility. Blue line represents the RH measurements. Black horizontal line represents the 60% threshold and red horizontal line represents the 30% threshold.
